# Supplementary material for: Palmdelphin, a novel target of p53 with Ser46 phosphorylation, controls cell death in response to DNA damage
Source: PubMed Central journal article supplement — Cell Death Dis. 2014 May 8;5(5):e1221–. doi: 10.1038/cddis.2014.176 (PMC4047856; doi:10.1038/cddis.2014.176), 2014-05-08
Supplement: cddis2014176x1.pdf [file cddis2014176x1.pdf]

# Supplements

## Palmdelphin, a novel target of p53 with Ser46 phosphorylation, controls cell death in response to DNA damage

Nurmaa Dashzeveg, Naoe Taira, Zheng-Guang Lu, Junko Kimura, and Kiyotsugu Yoshida

### Supplemental figure 1

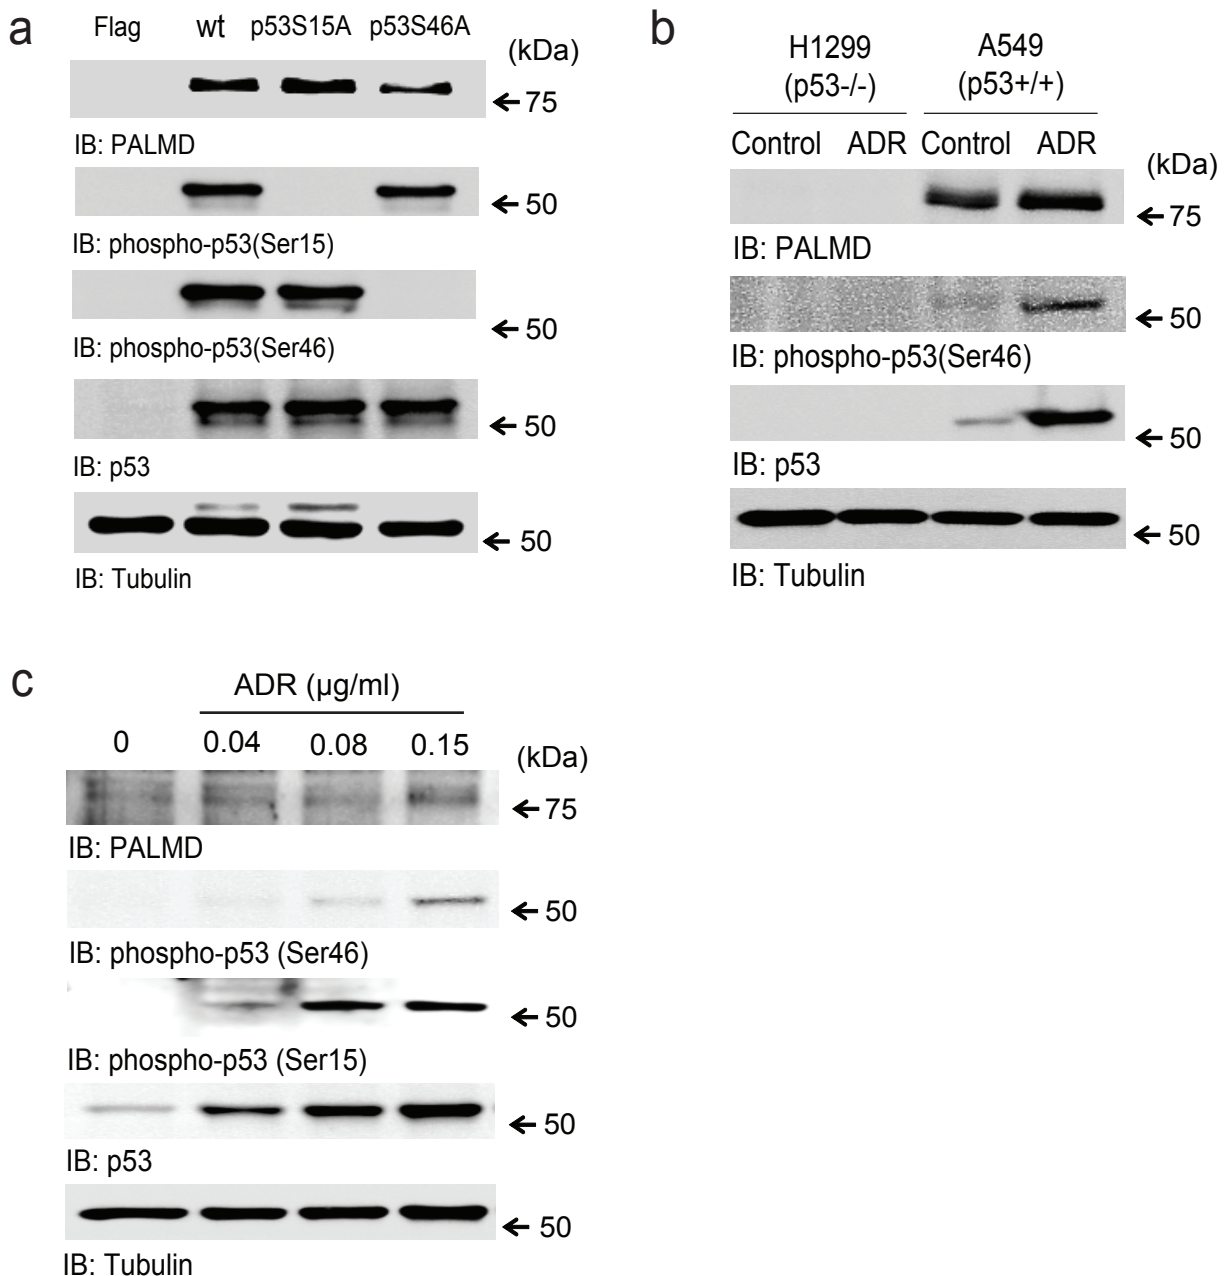

**Supplemental figure 1. PALMD is induced by p53 when ser46 is phosphorylated.** (a) SaOS2 cells were transfected with empty vector (Flag), wt-p53 (wt), p53S15A, or p53S46A. Cell lysates were immuno-blotted against anti-PALMD (top panel), anti-phospho-p53(Ser46) (second panel), anti-phospho-p53(Ser15) (third panel), anti-p53 (fourth panel), or anti-tubulin (bottom panel). (b) H1299 (p53<sup>-/-</sup>) and A549 (p53<sup>+/+</sup>) cells were treated with 0.2 μg/ml ADR and incubated for 24 h. Cell lysates were immunoblotted with anti-PALMD (top panel), anti-phospho-p53(Ser46) (second panel), anti-p53 (third panel), or anti-tubulin (bottom panel). (c) U2OS cells were treated with ADR with indicated dose and incubated for 24 h. Cell lysates were immunoblotted against anti-PALMD (top panel), anti-phospho-p53(Ser46) (second panel), anti-phospho-p53(Ser15) (third panel), anti-p53 (fourth panel), or anti-tubulin (bottom panel).
