# Supplementary material for: Palmdelphin, a novel target of p53 with Ser46 phosphorylation, controls cell death in response to DNA damage
Source: PubMed Central journal article supplement — Cell Death Dis. 2014 May 8;5(5):e1221–. doi: 10.1038/cddis.2014.176 (PMC4047856; doi:10.1038/cddis.2014.176), 2014-05-08
Supplement: cddis2014176x2.pdf [file cddis2014176x2.pdf]

# Supplements

## Palmdelphin, a novel target of p53 with Ser46 phosphorylation, controls cell death in response to DNA damage

Nurmaa Dashzeveg, Naoe Taira, Zheng-Guang Lu, Junko Kimura, and Kiyotsugu Yoshida

### Supplemental figure 2

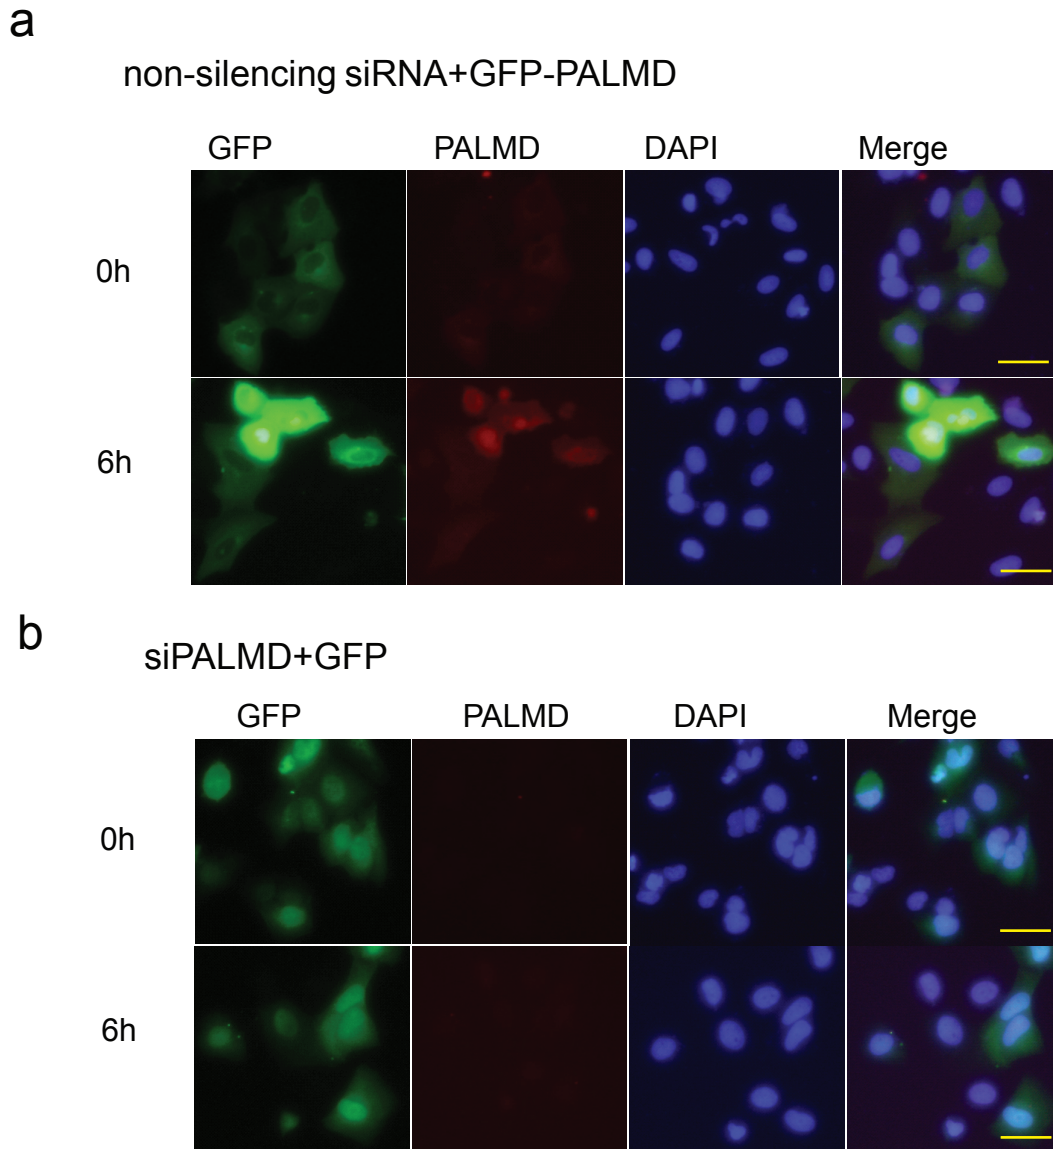

### Supplemental figure 2. Transfection efficiency by immunofluorescence.

U2OS cells were transfected with non-silencing siRNA and GFP-tagged PALMD (a) or siRNA of PALMD and GFP vector (b). Cells were treated with ADR or left untreated and incubated for 6 h. The scale bars indicate 40  $\mu$ m.
