# Supplementary material for: Palmdelphin, a novel target of p53 with Ser46 phosphorylation, controls cell death in response to DNA damage
Source: PubMed Central journal article supplement — Cell Death Dis. 2014 May 8;5(5):e1221–. doi: 10.1038/cddis.2014.176 (PMC4047856; doi:10.1038/cddis.2014.176), 2014-05-08
Supplement: cddis2014176x3.pdf [file cddis2014176x3.pdf]

# Supplements

## Palmdelphin, a novel target of p53 with Ser46 phosphorylation, controls cell death in response to DNA damage

Nurmaa Dashzeveg, Naoe Taira, Zheng-Guang Lu, Junko Kimura, and Kiyotsugu Yoshida

### Supplemental figure 3

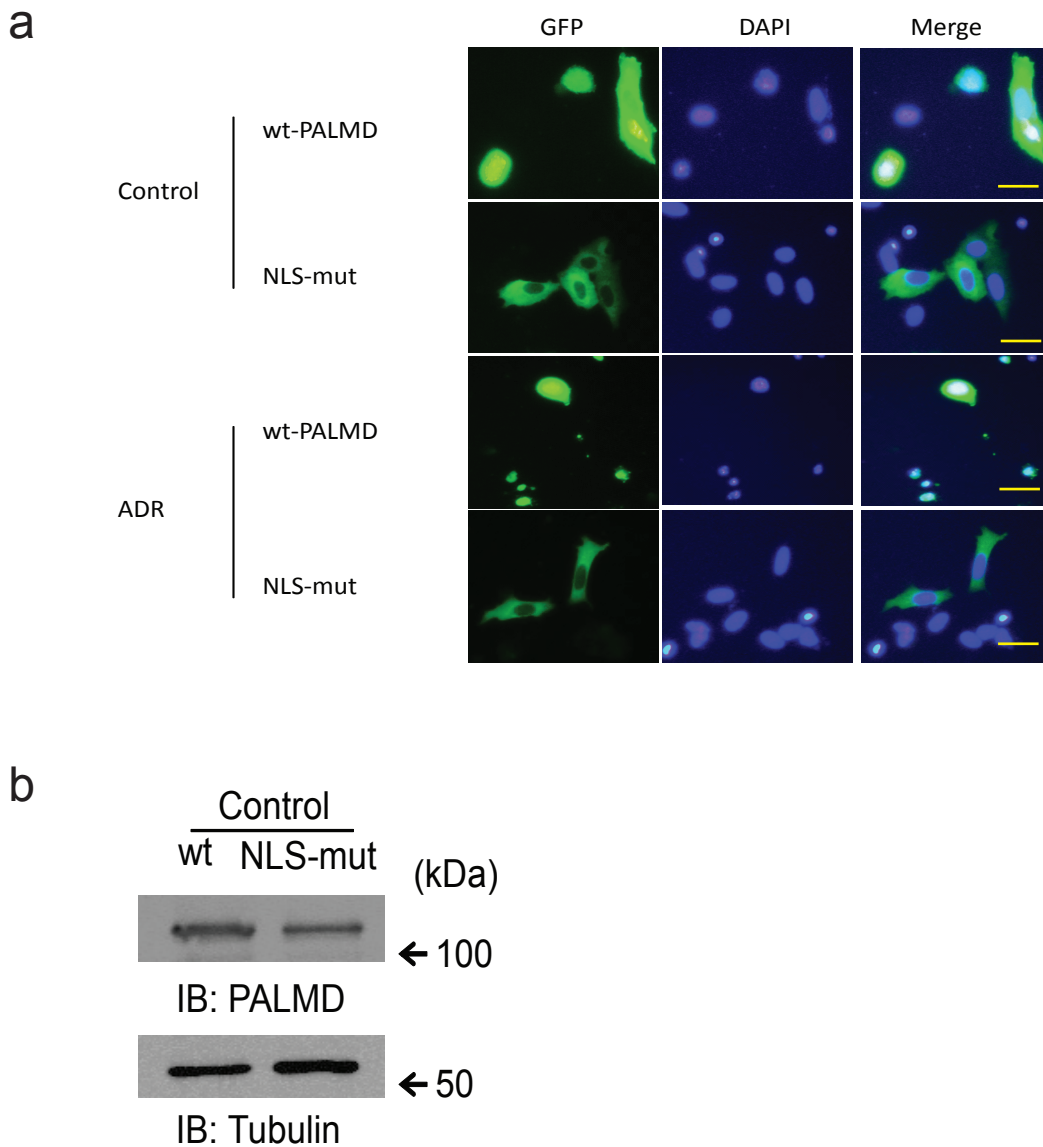

### Supplemental figure 3. PALMD dominantly accumulates in the nucleus in response to DNA damage.

(a) Localization of PALMD into nucleus was failed in NLS-mut transfected cells. U2OS cells were seeded in 4-well chamber slides and transfected with GFP-tagged wt-PALMD or NLS-mut. Cells were treated or left untreated with ADR. Nuclei were illustrated by DAPI. The scale bars indicate 40  $\mu$ m. (b) Transfection efficiency of GFP-tagged wt-PALMD and NLS mut. Cell lysates were immuno-blotted against anti-PALMD (upper panel) or anti-tubulin (lower panel).
