# Supplementary material for: Palmdelphin, a novel target of p53 with Ser46 phosphorylation, controls cell death in response to DNA damage
Source: PubMed Central journal article supplement — Cell Death Dis. 2014 May 8;5(5):e1221–. doi: 10.1038/cddis.2014.176 (PMC4047856; doi:10.1038/cddis.2014.176), 2014-05-08
Supplement: cddis2014176x4.pdf [file cddis2014176x4.pdf]

# Supplements

## Palmdelphin, a novel target of p53 with Ser46 phosphorylation, controls cell death in response to DNA damage

Nurmaa Dashzeveg, Naoe Taira, Zheng-Guang Lu, Junko Kimura, and Kiyotsugu Yoshida

Supplemental figure 4

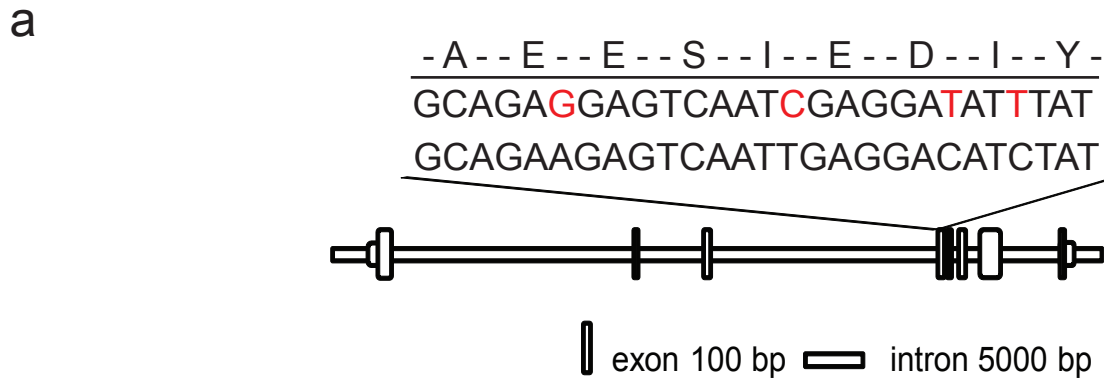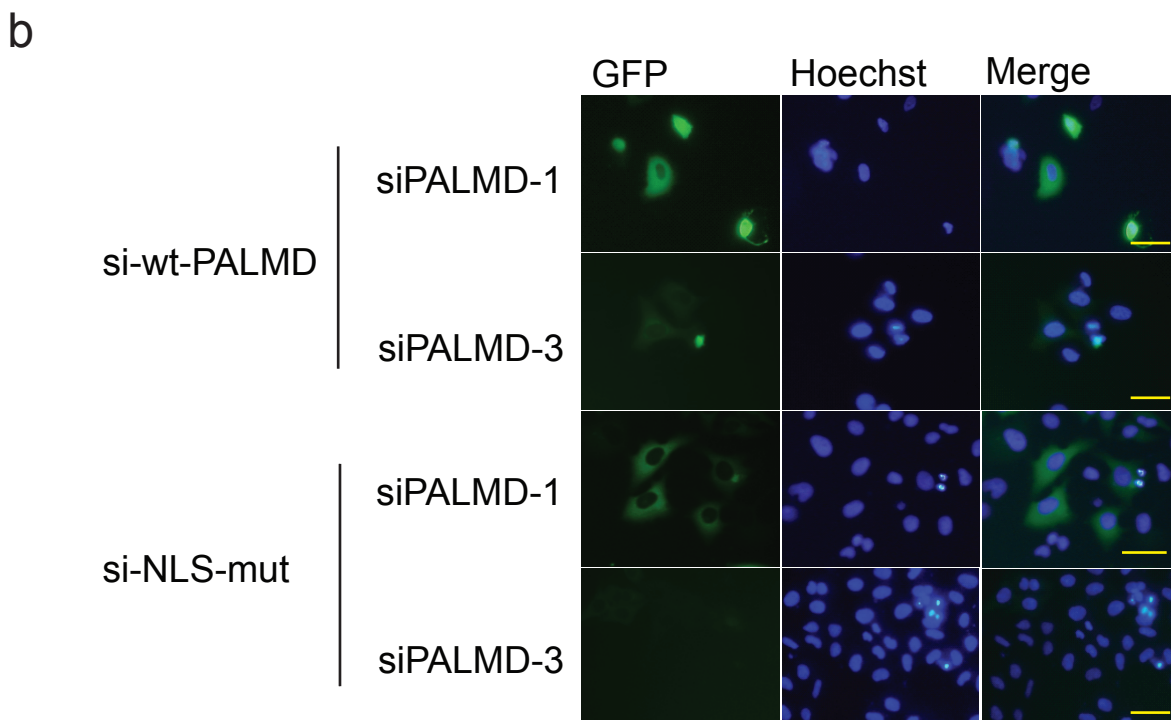

### Supplemental figure 4. siRNA resistant PALMD and NLS-mut were designed.

(a) Target site of siRNA of PALMD. Resistant of siRNA of PALMD (si-wt-PALMD) and NLS mutant (si-NLS-mut) were designed against siPALMD-1. Red color indicates mutated sites.

(b) siPALMD-1 resistant plasmids were examined. U2OS cells were co-transfected with si-wt-PALMD and siPALMD-1, or siPALMD-3. And also, cells were co-transfected with si-NLS-mut and siPALMD-1, or siPALMD-3. Cells were incubated for 24 h. The nuclei were illustrated with Hoechst. The scale bars indicate 40  $\mu$ m.
